# Supplementary material
Source: Springer Nature journal article supplement (https://www.springermedizin.de/resource/supplementary/12936_2014_3278_MOESM2_ESM.pdf/9545484)
Supplement: MOESM2 [file 9545484]

## Additional file 2

'Excluded articles with reasons'.

| Excluded article           | Reason for exclusion                                                                                                       |
|----------------------------|----------------------------------------------------------------------------------------------------------------------------|
| Alfred Tiono 2010 et al.   | Abstract. Author referred to Tiono <i>et al.</i> 2013                                                                      |
| Ashton et al.              | Only opinion of CHWs on ease of handling of RDT.                                                                           |
| Betson 2011 et al.         | Abstract.                                                                                                                  |
| Bjorkman 2011 et al.       | Abstract. Study described in Msellem <i>et al.</i> 2009 (PLoS Med): no use of CHWs.                                        |
| Blanas et al. 2010         | Abstract. Full study described in Blanas <i>et al.</i> 2013                                                                |
| Brieger et al. 2011        | Abstract.                                                                                                                  |
| Buwembo 2012 et al.        | Abstract.                                                                                                                  |
| De Smet et al.             | Abstract. Author suggested Tayler-Smith <i>et al.</i> 2011.                                                                |
| Diarra 2012 et al.         | Community clinic health workers. No response on question whether these met the definition of CHWs.                         |
| Diouf 2010 et al.          | Abstract. Not specific on RDT based home-management intervention.                                                          |
| Gerstl 2010 et al.         | No CHWs.                                                                                                                   |
| Gerstl 2009 et al.         | Abstract. Full text in Malaria J 2010: not about CHWs.                                                                     |
| Hopkins 2011 et al.        | Only data available for all health workers combined, not separately for CHWs.                                              |
| Iyer 2011 et al.           | Abstract. About integrated CCM.                                                                                            |
| Jean et al. 2011           | Abstract, full study described in Tine <i>et al.</i> 2011 (Malaria J)                                                      |
| Landoh 2012 et al.         | Morbidity study not focused on RDT based CCMm                                                                              |
| Luchavez et al. 2007       | Not situated in SSA and not the right outcome.                                                                             |
| Masanja et al. 2010        | Only data available for all health workers combined, not separately for 'volunteers'.                                      |
| Muhindo et al. 2012        | No CHWs performing RDTs.                                                                                                   |
| Ndiaye et al. 2011         | Abstract. Described in Ndiaye <i>et al.</i> 2013                                                                           |
| Ndiaye et al. 2012         | Abstract. Described in Ndiaye <i>et al.</i> 2013                                                                           |
| Ndyomugenyi et al. 2012    | Abstract.                                                                                                                  |
| Ngasala 2011 et al.        | RDTs only used for first screening, treatment and follow-up based on subsequent microscopy result so no relevant outcomes. |
| Orji et al. 2012           | Abstract.                                                                                                                  |
| Ouaterra et al. 2011       | No CHWs.                                                                                                                   |
| Pagnoni et al. 2011        | Abstract, full study described in Mukanga <i>et al.</i> 2012 (multi-country study)                                         |
| Ponsar et al. 2009         | Abstract.                                                                                                                  |
| Roger et al. 2011          | Abstract, full study by Tine <i>et al.</i> 2011                                                                            |
| Rutta et al. 2009          | Abstract, full study by Rutta <i>et al.</i> 2012.                                                                          |
| Shekalaghe et al. 2013     | No CHWs.                                                                                                                   |
| Silumbe et al. 2012        | Abstract.                                                                                                                  |
| Thiam et al. 2012 (AMJTMH) | Abstract.                                                                                                                  |
| Thiam et al. 2012 (AJTMH)  | Abstract. Full study in Thiam <i>et al.</i> 2012 (Malaria J)                                                               |
| Thiam et al. 2011          | Abstract. Full study in Thiam <i>et al.</i> 2012 (Malaria J)                                                               |
| Tine 2011 et al.           | Intervention directed at IPT instead of RDT based CCMm.                                                                    |
| Willcox et al.             | RDTs not performed by CHWs.                                                                                                |
| Yeboah-Antwi et al. 2009   | Abstract. Full study described in Yeboah-Antwi <i>et al.</i> 2010.                                                         |
